# Supplementary material for: Novel Nanobiocatalyst Constituted by Lipase from Burkholderia cepacia Immobilized on Graphene Oxide Derived from Grape Seed Biochar
Source: MDPI journal article supplement (doi:10.3390/c9010012), 2023-01-19
Supplement: s1 [file s1]

# SUPPORTING INFORMATION

## **Novel nanobiocatalyst constituted by lipase from *Burkholderia cepacia* immobilized on graphene oxide derived from grape seed biochar**

**Lays C. de Almeida<sup>1,2</sup>, Erikles L. O. Andrade<sup>2</sup>, Jefferson C. B. Santos<sup>2</sup>, Roberta M. Santos<sup>3</sup>, Alini T. Fricks<sup>4</sup>, Lisiane dos S. Freitas<sup>3</sup>, Álvaro S. Lima<sup>1,2</sup>, Matheus M. Pereira<sup>5\*</sup> and Cleide M. F. Soares<sup>1,2\*</sup>**

<sup>1</sup> Institute of Technology and Research, Avenida Murilo Dantas 300, Aracaju 49032-490, Brazil

<sup>2</sup> Tiradentes University, Avenida Murilo Dantas 300, Aracaju 49032-490, Brazil

<sup>3</sup> Department of Chemistry, Federal University of Sergipe, Av. Marechal Rondon, s/n, Jd. Rosa Elze, São Cristóvão 49100-000, Brazil

<sup>4</sup> Department of Bromatological Analysis, Faculty of Pharmacy, Federal University of Bahia. Av. Barão de Jeremoabo s/n, 40170-115 Salvador, Brazil

<sup>5</sup> CICECO – Aveiro Institute of Materials, Chemistry Department, University of Aveiro, 3810-193 Aveiro, Portugal

\* Correspondence: matheus.pereira@ua.pt, cleide18@yahoo.com.br.

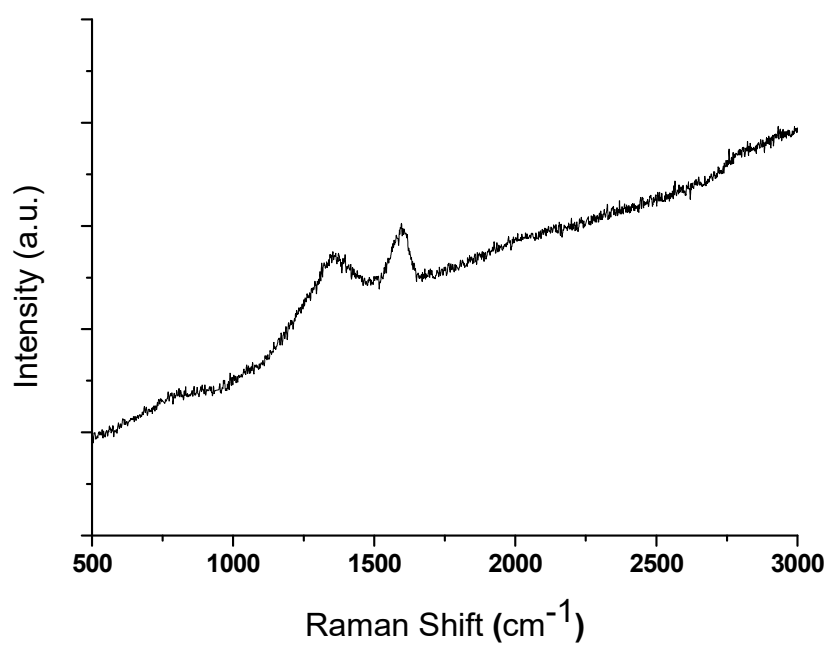

**Figure S1.** Raman spectrum of GO obtained from grape seed biochar. For Raman spectra were recorded from 750 to 3500  $\text{cm}^{-1}$  on a Raman Renishaw 2000 Microprobe Confocal (Renishaw Instruments, England) using a 514.5 nm argon ion laser.

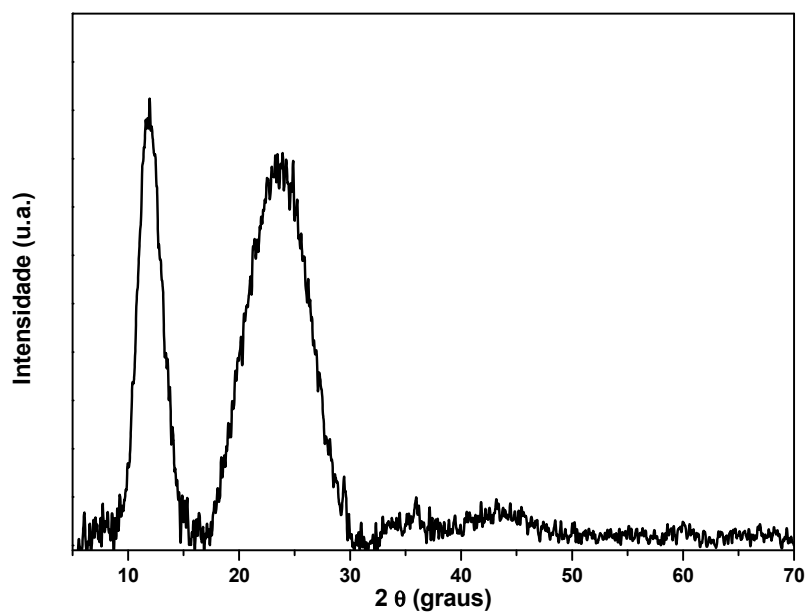

**Figure S2.** X-ray diffraction (XRD) pattern of graphene oxide from grape seed biochar. For recording XRD patterns, a diffractometer with Cu K $\alpha$  radiation operating at 40 kV with 40 mA was used while  $2\theta$  values tested for ranged between 5–80°.

**Table S1.** Effect of pH variation on BCL immobilization process.

| <b>pH<br/>immobilization</b> | <b>Hydrolytic activity<br/>(U/g)</b> | <b>Relative activity (%)</b> |
|------------------------------|--------------------------------------|------------------------------|
| 4                            | 145 ± 1                              | 52 ± 1                       |
| 6                            | 93 ± 2                               | 38± 2                        |
| 7                            | 52 ± 3                               | 28± 3                        |
| 8                            | 50 ± 1                               | 29± 1                        |
| 10                           | 5 ± 2                                | 1± 2                         |

**Table S2.** Distribution of amino acids of the BCL and their respective charges for pH 4, 7 and 10.

|       | ARG |     | ASP |     | GLU |     | HIS |     | LYS |     | TYR |    |
|-------|-----|-----|-----|-----|-----|-----|-----|-----|-----|-----|-----|----|
|       | -   | +   | -   | +   | -   | +   | -   | +   | -   | +   | -   | +  |
|       |     |     |     |     |     |     |     |     |     |     |     |    |
| pH 4  |     | 8   | 2   | 55  | 63  | 28  | 15  | 204 |     | 22  |     | 4  |
|       |     | 40  | 21  | 56  |     | 35  | 86  | 286 |     | 70  |     | 9  |
|       |     | 61  | 36  | 228 |     | 118 | 114 |     | 80  |     | 23  |    |
|       |     | 94  | 102 | 288 |     | 197 | 311 |     | 165 |     | 29  |    |
|       |     | 115 | 121 |     |     | 289 |     |     | 269 |     | 31  |    |
|       |     | 258 | 130 |     |     | 302 |     |     | 283 |     | 45  |    |
|       |     | 297 | 159 |     |     |     |     |     | 316 |     | 68  |    |
|       |     | 309 | 236 |     |     |     |     |     |     |     | 95  |    |
|       |     | 314 | 242 |     |     |     |     |     |     |     | 129 |    |
|       |     |     | 264 |     |     |     |     |     |     |     | 175 |    |
|       |     |     | 303 |     |     |     |     |     |     |     | 179 |    |
|       |     |     |     |     |     |     |     |     |     |     | 207 |    |
|       |     |     |     |     |     |     |     |     |     |     | 274 |    |
|       |     |     |     |     |     |     |     |     |     | 282 |     |    |
| pH 7  | ARG |     | ASP |     | GLU |     | HIS |     | LYS |     | TYR |    |
|       | -   | +   | -   | +   | -   | +   | -   | +   | -   | +   | -   | +  |
|       |     | 8   | 2   |     | 28  | 289 | 15  | 286 |     | 22  |     | 4  |
|       |     | 40  | 21  |     | 35  |     | 86  |     | 70  |     | 9   |    |
|       |     | 61  | 36  |     | 63  |     | 114 |     | 80  |     | 23  |    |
|       |     | 94  | 55  |     | 118 |     | 204 |     | 165 |     | 29  |    |
|       |     | 115 | 56  |     | 197 |     | 311 |     | 269 |     | 31  |    |
|       |     | 258 | 102 |     | 302 |     |     |     | 283 |     | 45  |    |
|       |     | 297 | 121 |     |     |     |     |     | 316 |     | 68  |    |
|       |     | 309 | 130 |     |     |     |     |     |     |     | 95  |    |
|       |     | 314 | 159 |     |     |     |     |     |     |     | 129 |    |
|       |     |     | 228 |     |     |     |     |     |     |     | 175 |    |
|       |     |     | 236 |     |     |     |     |     |     |     | 179 |    |
|       |     | 242 |     |     |     |     |     |     |     | 207 |     |    |
|       |     | 264 |     |     |     |     |     |     |     | 274 |     |    |
|       |     | 288 |     |     |     |     |     |     |     | 282 |     |    |
|       |     | 303 |     |     |     |     |     |     |     |     |     |    |
| pH 10 | ARG |     | ASP |     | GLU |     | HIS |     | LYS |     | TYR |    |
|       | -   | +   | -   | +   | -   | +   | -   | +   | -   | +   | -   | +  |
|       |     | 8   | 2   |     | 28  | 289 | 15  |     | 22  |     | 4   | 23 |
|       |     | 40  | 21  |     | 35  |     | 86  |     | 70  |     | 9   | 29 |
|       |     | 61  | 36  |     | 63  |     | 114 |     | 80  |     | 31  |    |
|       |     | 94  | 55  |     | 118 |     | 204 |     | 165 |     | 45  |    |
|       |     | 115 | 56  |     | 197 |     | 286 |     | 269 |     | 68  |    |
|       |     | 258 | 102 |     | 302 |     | 311 |     | 283 |     | 95  |    |
|       |     | 297 | 121 |     |     |     |     |     | 316 |     | 129 |    |
|       |     | 309 | 130 |     |     |     |     |     |     |     | 175 |    |
|       |     | 314 | 159 |     |     |     |     |     |     |     | 179 |    |
|       |     |     | 228 |     |     |     |     |     |     |     | 207 |    |
|       |     |     | 236 |     |     |     |     |     |     |     | 274 |    |
|       |     | 242 |     |     |     |     |     |     |     | 282 |     |    |
|       |     | 264 |     |     |     |     |     |     |     |     |     |    |
|       |     | 288 |     |     |     |     |     |     |     |     |     |    |
|       |     | 303 |     |     |     |     |     |     |     |     |     |    |

The amino acids are located on the surface of the enzyme molecule

**Table S3.** Immobilization Yield (%), Hydrolytic activity (U/g) and Relative activity (%) as a function of enzyme/support ratio during immobilization of the BCL on graphene oxide.

| ((g)enzyme/ (g) support) | Immobilization Yield (%) | Hydrolytic activity (U/g) | Relative activity (%) |
|--------------------------|--------------------------|---------------------------|-----------------------|
| 0,15                     | 22 ± 1                   | 107 ± 1                   | 23 ± 1                |
| 0,225                    | 24 ± 2                   | 180 ± 2                   | 39 ± 2                |
| 0,3                      | 32 ± 2                   | 290 ± 2                   | 64 ± 2                |
| 0,375                    | 36 ± 1                   | 457 ± 1                   | 100 ± 1               |
| 0,45                     | 33 ± 2                   | 438 ± 2                   | 96 ± 2                |

**Table S4** pH effect on the activity the immobilized BCL by physical adsorption (PA) onto Graphene Oxide

| pH | Hydrolytic activity (U/g) | Relative activity (%) |
|----|---------------------------|-----------------------|
| 2  | 279 ± 3                   | 60 ± 3                |
| 3  | 462 ± 2                   | 100 ± 2               |
| 4  | 240 ± 2                   | 52 ± 2                |
| 5  | 174 ± 3                   | 38 ± 3                |
| 6  | 130 ± 2                   | 28 ± 2                |
| 7  | 135 ± 2                   | 29 ± 2                |
| 8  | 1 ± 2                     | 1 ± 2                 |
| 9  | 0                         | 10                    |
| 10 | 0                         | 0                     |

**Table S5.** Temperature effect on the immobilized BCL by physical adsorption (PA) onto graphene oxide.

| Temperature (°C) | Hydrolytic activity (U/g) | Relative activity (%) |
|------------------|---------------------------|-----------------------|
| 40               | 493 ± 3                   | 74 ± 3                |
| 50               | 661 ± 2                   | 100 ± 2               |
| 60               | 570 ± 2                   | 86 ± 2                |
| 70               | 420 ± 3                   | 63 ± 3                |
| 80               | 423 ± 2                   | 64 ± 2                |

**Table S6.** Thermal stability of the immobilized biocatalyst incubated at 50° C.

| <b>Incubation time (min)</b> | <b>Hydrolytic activity (U/g)</b> | <b>Relative activity (%)</b> |
|------------------------------|----------------------------------|------------------------------|
| 0                            | 662 ± 1                          | 100 ± 1                      |
| 30                           | 528 ± 2                          | 79± 2                        |
| 60                           | 453 ± 2                          | 68± 2                        |
| 120                          | 444 ± 3                          | 67± 3                        |
| 180                          | 324± 1                           | 49± 1                        |

**Table S7.** Operational stability of the immobilized biocatalyst.

| <b>Cycle number</b> | <b>Hydrolytic activity (U/g)</b> | <b>Relative activity (%)</b> |
|---------------------|----------------------------------|------------------------------|
| 1                   | 685 ± 3                          | 100 ± 3                      |
| 2                   | 642 ± 2                          | 94± 2                        |
| 3                   | 520 ± 2                          | 76± 2                        |
| 4                   | 473 ± 3                          | 73± 3                        |
| 5                   | 251 ± 2                          | 69± 2                        |
